# Supplementary material
Source: HighWire-hosted journal article supplement (https://www.annfammed.org/highwire/filestream/8224/field_highwire_adjunct_files/0/Miedema_Suppl_App.pdf)
Supplement: Miedema_Suppl_App.pdf [file Miedema_Suppl_App.pdf]

**Online Supplementary Material**

Miedema B, MacIntyre L, Tatemichi S, et al. How the medical culture contributes to coworker-perpetrated harassment and abuse of family physicians. *Ann Fam Med*. 2012;10(2):111-117.

<http://www.annfammed.org/content/10/2/111/DC1>

---

**Supplemental Appendix. Interview Guide**

**Family Physicians Workplace Abusive and Violent Encounters Study**

Before we start our interview, I would like to advise you not to use names of people or institutions that may identify them. We will remove all inadvertent references to people and places from the transcripts.

**Interview Questions**

1. Can you tell me a bit about the abuse or violence you encountered?  
Probes: How did it happen? Where? Did you expect it?
2. Now that you have had time to reflect on the abuse/violence, can you tell me a bit about the impact it has had on your life?  
Probes: Are you still scared? Have you taken time off work to recover?
3. Has this incident had a psychological impact on you?  
Probes: Describe impact. How have you coped?
4. Has this incident had an impact on your family?  
Probes: Describe impact. How did you disclose? Actions taken.
5. Have you reported the incidents to others? What was their response?
6. Have you pressed charges [only when appropriate]?
7. What are you going to do next?
8. If we would develop recommendations to reduce this kind of abuse/violence, what should they be?
9. In what ways would you raise awareness about the issue of violence and abuse toward family physicians? What could be done to improve the situation?
10. Is there anything else you want to add?

Thanks given for participation.
